# Supplementary figures and images for: Modification of condensed tannins: from polyphenol chemistry to materials engineering
Source: Royal Society of Chemistry journal article supplement (doi:10.1039/c5nj02131f), 2015-11-06

## Condensed tannin functionalization

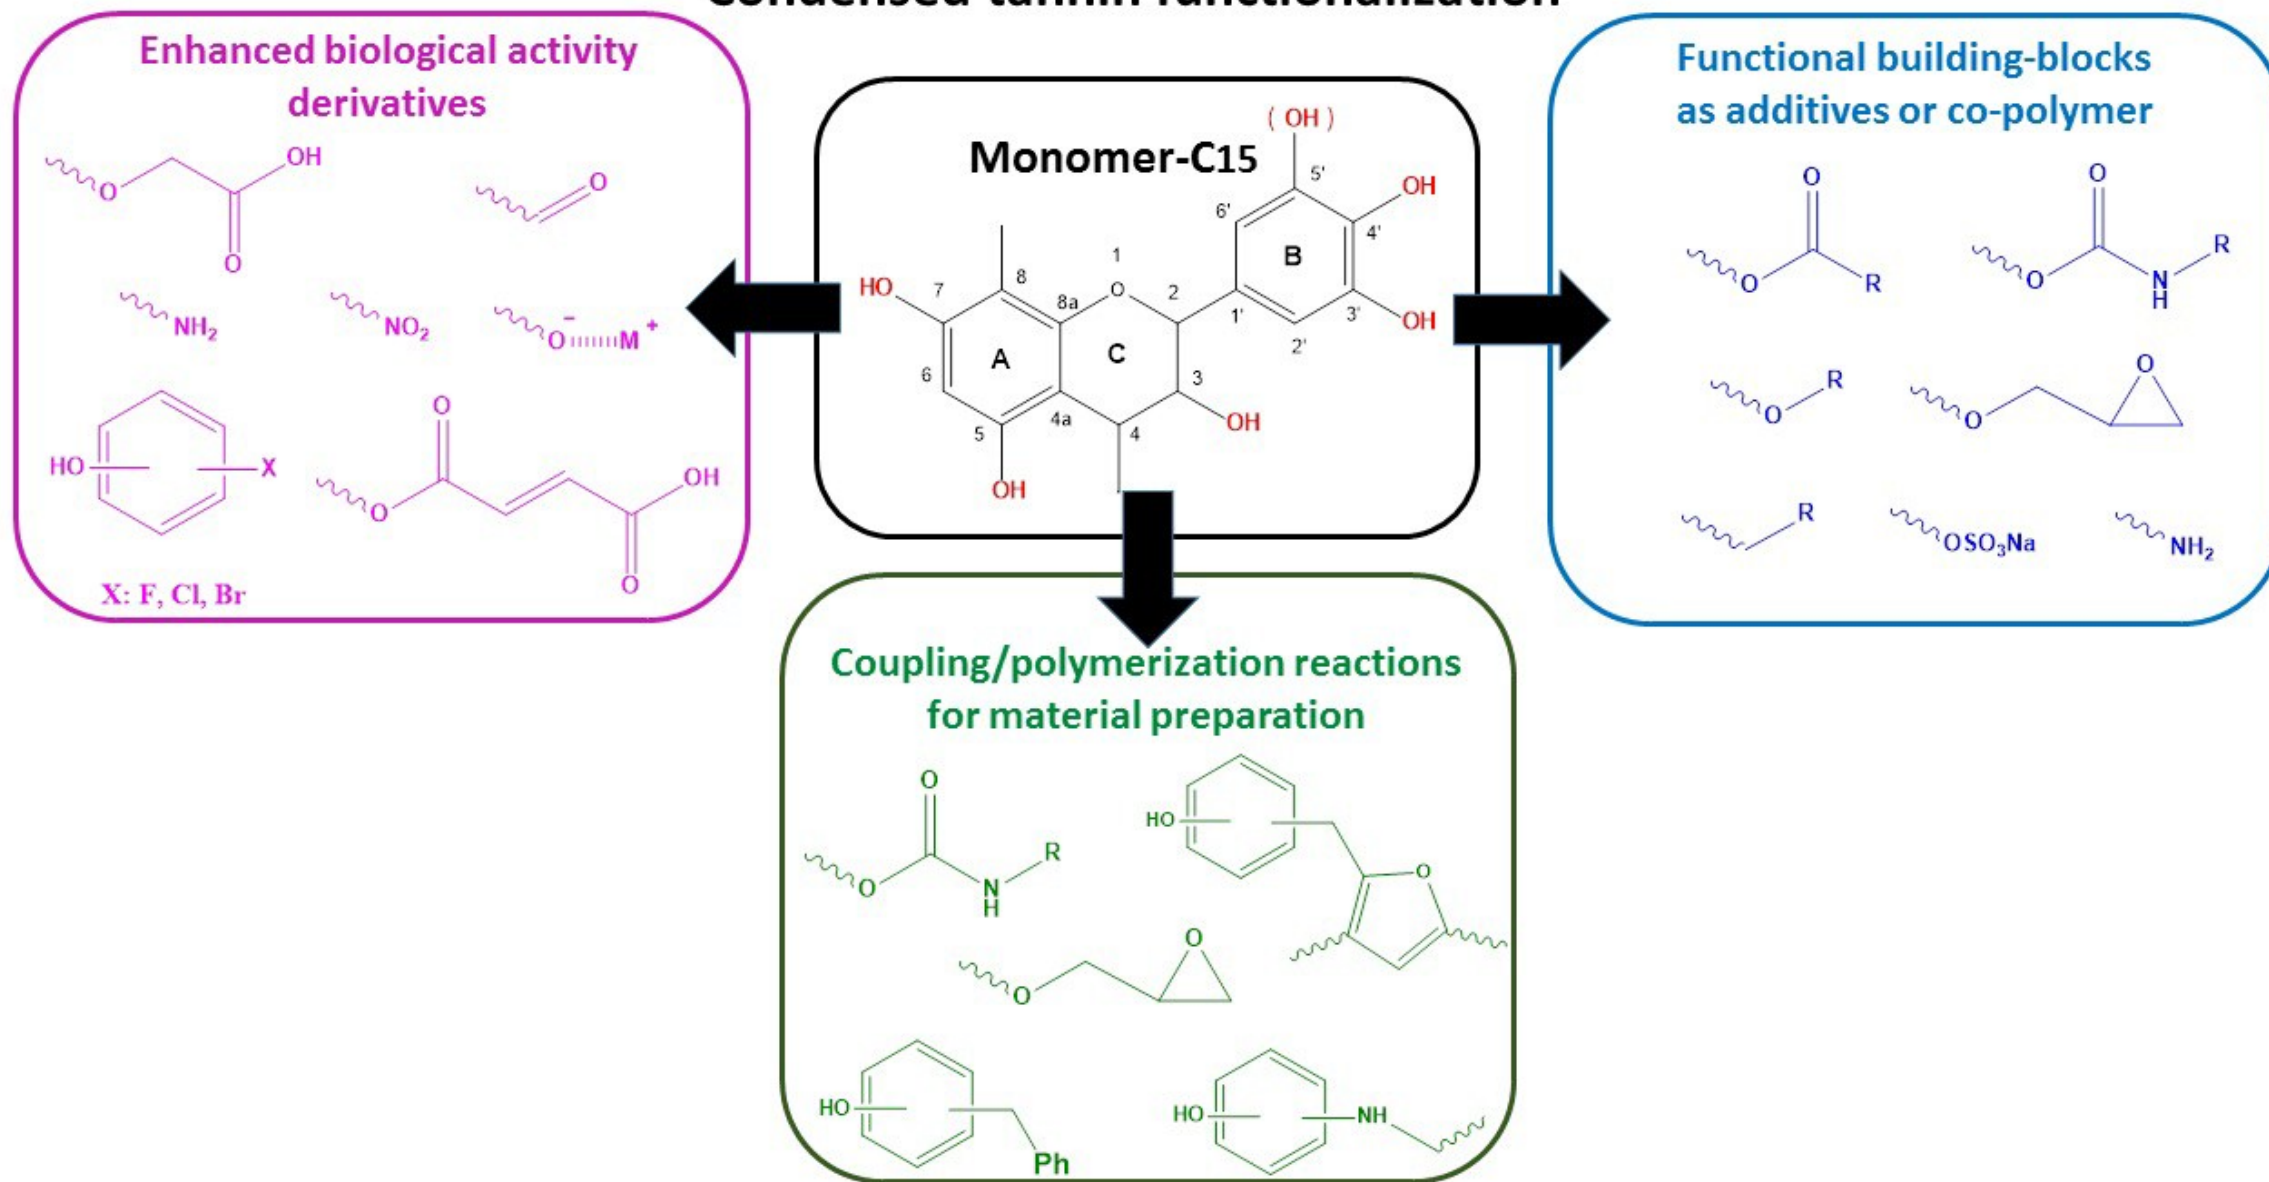

Supplement: c5nj02131f1.pdf [file c5nj02131f1.pdf]
